# Supplementary figures and images for: 1H and 19F ultra-fast MAS double-quantum single-quantum NMR correlation experiments using three-spin terms of the dipolar homonuclear Hamiltonian
Source: Royal Society of Chemistry journal article supplement (doi:10.1039/c0cp02202k), 2011-01-01

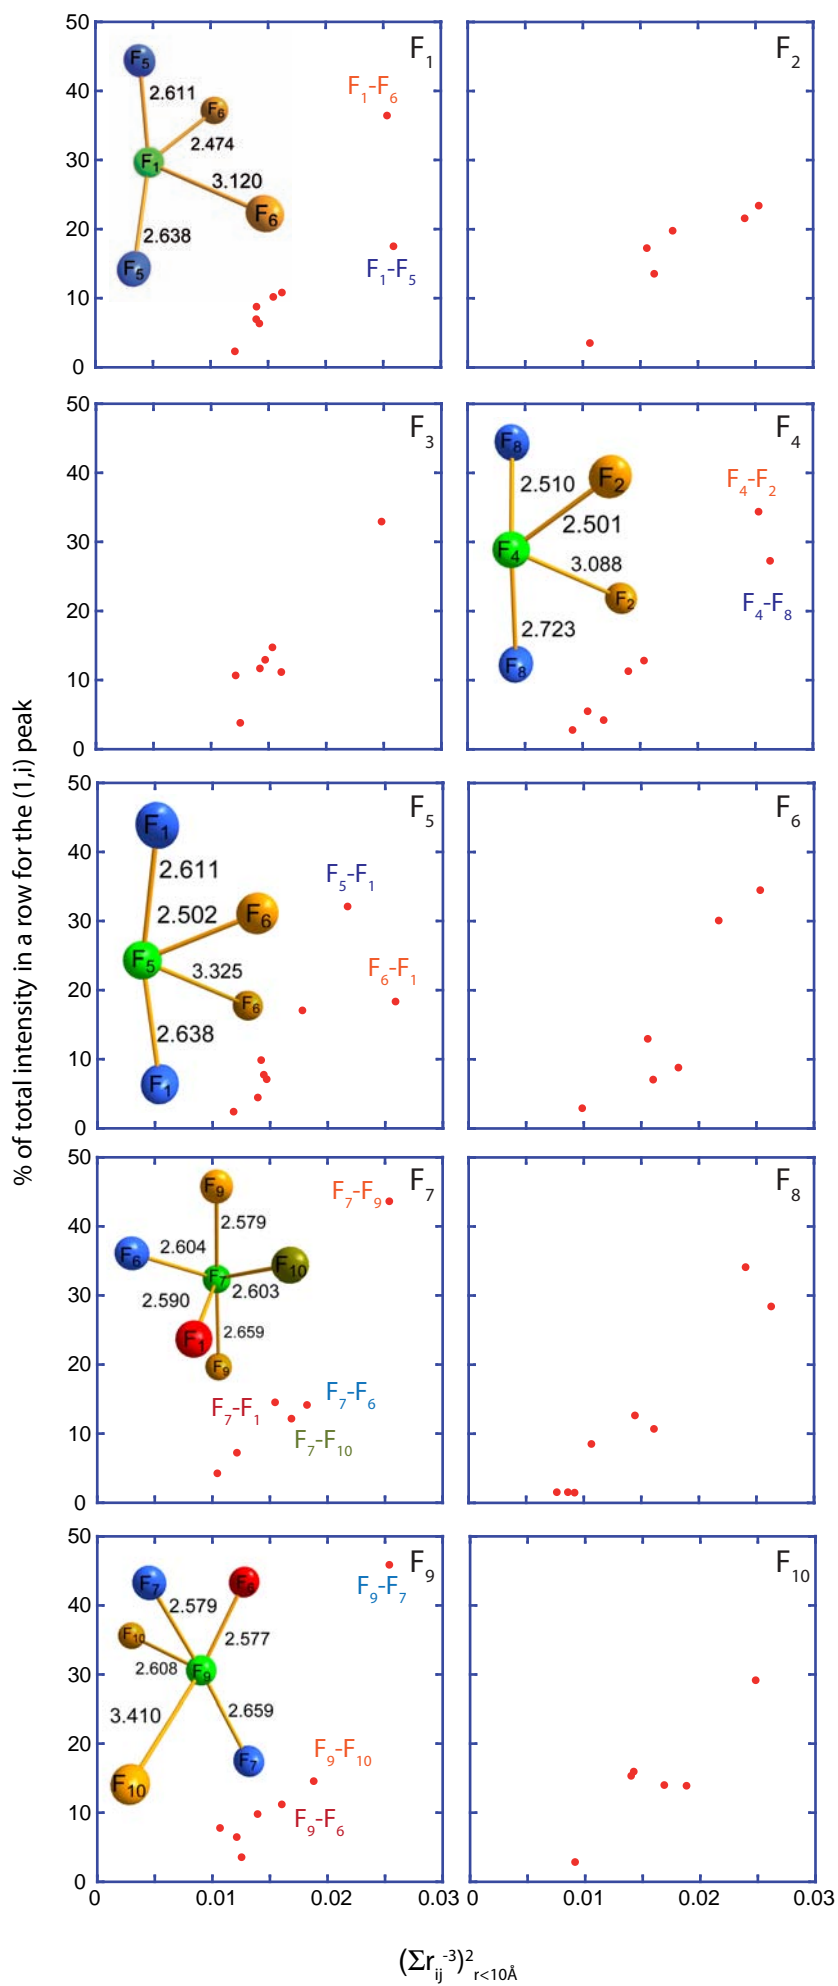

Supplement: c0cp02202k.pdf [file c0cp02202k.pdf]
